# Supplementary material for: Dietary Advanced Glycation End-Products and Colorectal Cancer Risk in the European Prospective Investigation into Cancer and Nutrition (EPIC) Study
Source: MDPI journal article supplement (doi:10.3390/nu13093132), 2021-09-08
Supplement: s1 [file s1]

**Supplementary Table S1:** Hazard ratios and 95% confidence intervals (CI) for colorectal cancer risk associated with AGEs intake, by sex, EPIC cohort study, 1992-2014

|               | Men (n=2,651 cases) |                    | Women (n=3,511 cases) |                    | <i>P</i> for heterogeneity |
|---------------|---------------------|--------------------|-----------------------|--------------------|----------------------------|
|               | Mean intake         | HR (95%CI)         | Mean intake           | HR (95%CI)         |                            |
| CML, mg/day   | 3.54±1.42           | 0.97 (0.93 - 1.01) | 2.9±1.2               | 0.96 (0.93 - 1.00) | 0.971                      |
| CEL, mg/day   | 2.51±1.04           | 0.99 (0.95 - 1.03) | 2.04±0.85             | 0.98 (0.95 - 1.02) | 0.600                      |
| MG-H1, mg/day | 24.3±10.9           | 0.97 (0.93 - 1.01) | 20.6±9                | 0.98 (0.94 - 1.01) | 0.667                      |

Abbreviations: AGE, Advanced Glycation End-product; CML, Nε-carboxy-methyllysine; CEL, Nε-carboxy-ethyllysine; MG-H1, Nδ-(5-hydro-5-methyl-4-imidazolone-2-yl)-ornithine. Models were adjusted for BMI, height, education, physical activity, smoking, energy intake, Mediterranean diet score and stratified by age (1-year categories) and centre.

**Supplementary Table S2:** Stratified analysis for colorectal cancer risk associated with AGEs intake by BMI, years of follow-up and by EPIC country.

|                                     |         | CML, mg/day        | CEL, mg/day        | MG-H1, mg/day      |
|-------------------------------------|---------|--------------------|--------------------|--------------------|
|                                     | N cases | HR (95%CI)         | HR (95%CI)         | HR (95%CI)         |
| <b>BMI</b>                          |         |                    |                    |                    |
| <25 kg/m <sup>2</sup>               | 2,575   | 0.96 (0.92 - 1.00) | 0.99 (0.95 - 1.03) | 0.98 (0.94 - 1.02) |
| 25-30 kg/m <sup>2</sup>             | 2,578   | 0.97 (0.93 - 1.01) | 0.95 (0.91 - 1.00) | 0.96 (0.92 - 1.00) |
| >30 kg/m <sup>2</sup>               | 1,009   | 1.02 (0.95 - 1.09) | 1.01 (0.94 - 1.07) | 1.01 (0.94 - 1.08) |
| <i>P</i> for heterogeneity          |         | 0.047              | 0.141              | 0.057              |
| <b>Years of follow-up for cases</b> |         |                    |                    |                    |
| ≤3 years                            | 1,041   | 1.05 (0.98 - 1.13) | 1.01 (0.93 - 1.09) | 1.03 (0.96 - 1.10) |
| >3&≤10 years                        | 2,683   | 1.00 (0.96 - 1.04) | 0.98 (0.94 - 1.03) | 1.00 (0.96 - 1.04) |
| >10 years                           | 2,438   | 0.97 (0.93 - 1.01) | 0.99 (0.95 - 1.04) | 0.98 (0.94 - 1.02) |
| <i>P</i> for heterogeneity          |         | 0.018              | 0.919              | 0.027              |
| <b>Country</b>                      |         |                    |                    |                    |
| France                              | 418     | 0.98 (0.88 - 1.08) | 1.02 (0.92 - 1.12) | 1.03 (0.93 - 1.14) |
| Italy                               | 588     | 0.99 (0.89 - 1.10) | 1.04 (0.93 - 1.17) | 1.01 (0.90 - 1.12) |
| Spain                               | 568     | 0.98 (0.89 - 1.08) | 0.98 (0.91 - 1.06) | 0.96 (0.87 - 1.05) |
| UK                                  | 1,024   | 0.95 (0.90 - 1.01) | 0.94 (0.88 - 1.00) | 0.96 (0.90 - 1.02) |
| Netherlands                         | 517     | 1.00 (0.89 - 1.14) | 1.04 (0.92 - 1.17) | 0.96 (0.84 - 1.09) |
| Germany                             | 461     | 0.99 (0.89 - 1.11) | 0.98 (0.89 - 1.09) | 0.98 (0.88 - 1.09) |
| Sweden                              | 933     | 0.96 (0.90 - 1.02) | 0.97 (0.91 - 1.03) | 0.98 (0.93 - 1.04) |
| Denmark                             | 1,342   | 0.98 (0.91 - 1.04) | 0.92 (0.85 - 0.99) | 0.95 (0.89 - 1.01) |
| Norway                              | 311     | 0.96 (0.83 - 1.10) | 0.95 (0.80 - 1.13) | 1.01 (0.87 - 1.16) |
| <i>P</i> for heterogeneity          |         | 0.907              | 0.428              | 0.868              |

Abbreviations: AGE, Advanced Glycation End-product; CML, Nε-carboxy-methyllysine; CEL, Nε-carboxy-ethyllysine; MG-H1, Nδ-(5-hydro-5-methyl-4-imidazolone-2-yl)-ornithine. Models were adjusted for BMI (except for model for BMI), height, education, physical activity, smoking, energy intake, Mediterranean diet score and stratified by age (1-year categories) and centre (except for model for Country)

**Supplementary Figure S1: Dietary contribution of individual advanced glycation end-products in the European Prospective Investigation into Cancer and Nutrition (EPIC).**

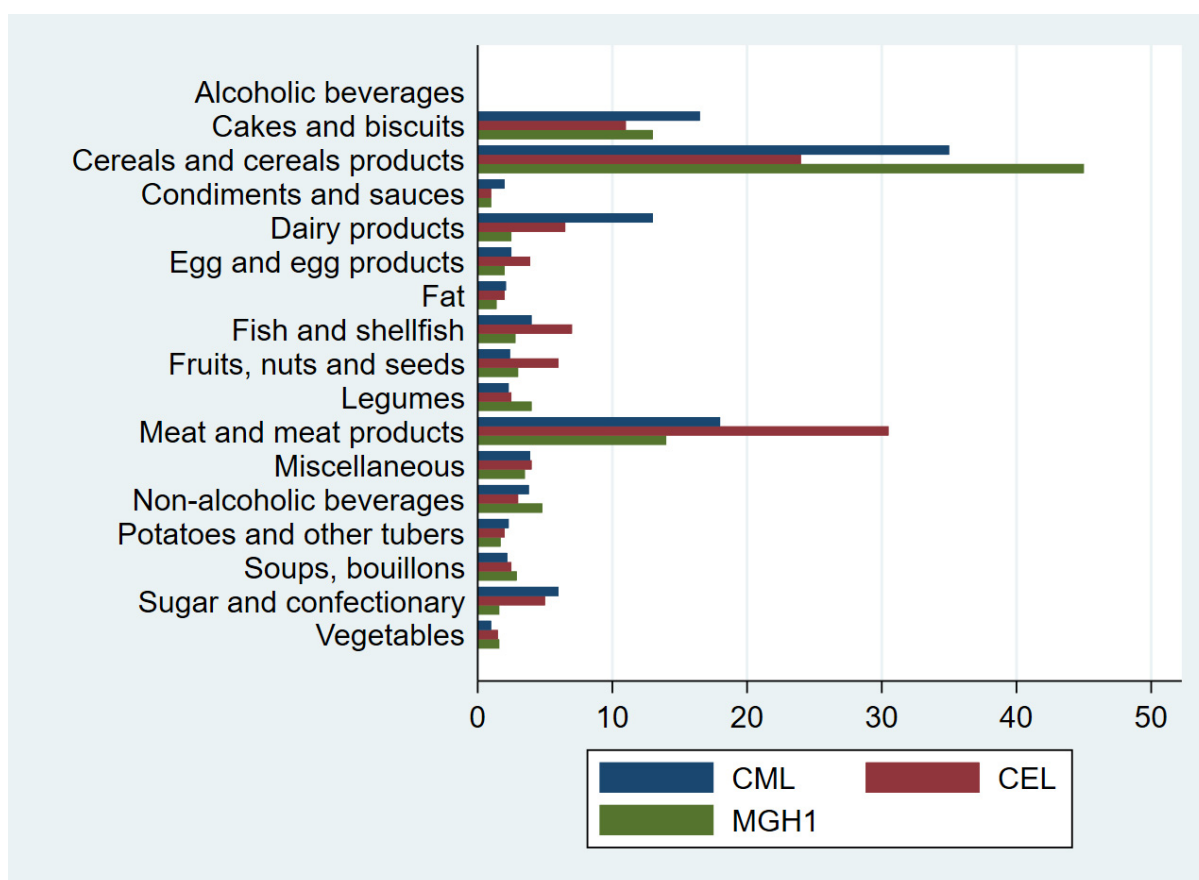

Abbreviations: AGE, Advanced Glycation End-product; CML, N $\epsilon$ -carboxy-methyllysine; CEL, N $\epsilon$ -carboxy-ethyllysine; MG-H1, N $\delta$ -(5-hydro-5-methyl-4-imidazolone-2-yl)-ornithine
